# Supplementary material
Source: publisher figshare collection journal article supplement (https://tandf.figshare.com/ndownloader/files/8359943)
Supplement: Supplementary file 1 [file 8359943]

# **Efficacy and safety of fluticasone furoate/vilanterol (50/25mcg; 100/25 mcg; 200/25 mcg) in Asian patients with chronic obstructive pulmonary disease**

Jinping Zheng, Teresita de Guia, Jie Wang-Jairaj, Amy H Newlands,  
Changzheng Wang, Courtney Crim and Nanshan Zhong

## **SUPPLEMENTAL MATERIAL/APPENDICES**

### **Supplementary Appendix 1 Methods: Exclusion criteria**

Exclusion criteria at the screening visit were as follows: pregnancy; current diagnosis of asthma or any other respiratory disorder, including  $\alpha$ 1-antitrypsin deficiency, as the underlying cause of COPD; an exacerbation requiring treatment with corticosteroids, antibiotics or other treatment prescribed by a physician in the 6 weeks prior to screening, or hospitalisation in the previous 12 weeks; lower respiratory tract infections requiring treatment with antibiotics in the previous 4 weeks; lung reduction surgery within the previous 12 months; use of long-term oxygen therapy >12 hours per day; medically unable to withhold albuterol or ipratropium bromide for 4 hours, or theophylline for 12 hours, prior to lung function test; participating in the acute phase of pulmonary rehabilitation in the previous 4 weeks or planning to enter the acute phase during the study. Clinically significant disease or abnormalities, that in the opinion of the investigator, would put safety of the patient at risk or affect efficacy or safety analysis. A history of hypersensitivity to any of the study medications including their excipients; a history of alcohol or drug abuse within the past 2 years; at risk of non-compliance; questionable validity of consent; prior use of study medication or other investigational drugs within 30 days of study entry or 5 half-lives of the investigational drug, whichever was longer; affiliation with any investigator or study centre.

Exclusion criteria at randomisation were: occurrence of an exacerbation or lower respiratory tract infection during the run-in period requiring treatment with systemic/oral corticosteroids and/or emergency treatment or hospitalisation; abnormal, clinically significant findings from 12-lead ECG or laboratory tests

performed at screening and pre-dose on the randomisation visit; failure to demonstrate adequate compliance with study procedures including taking the run-in medication.

**Supplementary Appendix 2** Other permitted and prohibited concomitant medications.

Permitted non-COPD medications included: cardioselective beta-blockers (stable dose) and ophthalmic beta-blockers; antihistamines and nasal decongestants; over-the-counter cough suppressants (for  $\leq 7$  days); intranasal sodium cromoglycate or nedocromil sodium; intranasal corticosteroids (stable daily dose for  $\geq 4$  weeks prior to screening and throughout the study); topical ( $\leq 1\%$  hydrocortisone in strength) or ophthalmic corticosteroids; antibiotics that are not strong inhibitors of cytochrome P450 3A4 for treatment ( $\leq 14$  days) of acute non-respiratory tract infections; influenza and/or pneumonia vaccination; tricyclic antidepressants and monoamine oxidase inhibitors (MAOIs); diuretics; treatment(s) for smoking cessation; and all medications for other disorders as long as the dose remained constant wherever possible and their use was not expected to affect lung function.

Prohibited concomitant medications are summarised in the table below.

| Prohibited concomitant medication                                                   | Timeframe of prohibition, prior to screening    |
|-------------------------------------------------------------------------------------|-------------------------------------------------|
| Depot corticosteroids                                                               | 12 weeks                                        |
| Any other investigational drug                                                      | 30 days (or 5 half lives, whichever was longer) |
| Systemic, oral, parenteral corticosteroids or cytochrome P450 3A4 strong inhibitors | 6 weeks                                         |
| ICS, ICS/LABA or antibiotics (for lower respiratory tract infection                 | 4 weeks                                         |
| Long-acting anticholinergics                                                        | 1 week                                          |
| Oral or inhaled LABAs; oral leukotriene inhibitors                                  | 48 hours                                        |
| Inhaled sodium cromoglycate or nedocromil sodium                                    | 24 hours                                        |
| Oral short-acting $\beta_2$ -agonists                                               | 12 hours                                        |
| Ipratropium/albuterol (salbutamol) combination                                      | 4 hours                                         |

product

Traditional or herbal medicines used for the treatment of COPD, including those with a known effect of bronchodilation; those with known effects on the HPA axis, heart rate and blood pressure, blood glucose and potassium levels; strong inhibitors of cytochrome P450 3A4; those with known effects on platelets and that could increase tendency to bleed

---

Prior to Visit 1 and at any time during the study

COPD = chronic obstructive pulmonary disease; HPA = hypothalamic-pituitary-adrenal; ICS = inhaled corticosteroid; LABA = long-acting beta<sub>2</sub> agonist.

**Supplementary Appendix 3** Details of the international review board committee names and approval numbers

|                            |                                          | Investigator   | Description of research facility,                                                             | Name of IEC/IRB committee,                                                                                                   |
|----------------------------|------------------------------------------|----------------|-----------------------------------------------------------------------------------------------|------------------------------------------------------------------------------------------------------------------------------|
| Investigator               | Sub-investigator                         | no./centre no. | hospital/institution, and address                                                             | address, committee chair                                                                                                     |
| China                      |                                          |                |                                                                                               |                                                                                                                              |
| Cai, Shaoxi. PhD           | Meng, Ying                               | 228043/094637  | Nanfang Hospital, No 1838                                                                     | Nanfang Hospital, Guangzhou Da                                                                                               |
|                            | Zhao, Haijin                             |                | Guangzhou Da dao bei Avenue,<br>Guangzhou, Guangdong, 510515,<br>China                        | dao bei Avenue, Guangzhou,<br>Guangdong, 510515, China<br><br>Chairperson: Zhang, Xun                                        |
| Chen, Baoyuan <sup>a</sup> | Cao, Jie                                 | 217019/082950  | Tianjin Medical University General                                                            | Tianjin Medical University General                                                                                           |
|                            | Dong, Lixia<br>Li, Jinna<br>Zhao, Haiyan |                | Hospital, No.154, Anshan Dao Road,<br>Heping District, Tianjin, 300052,<br>China              | Hospital, No.154, Anshan Dao<br>Road, Heping District, Tianjin,<br>300052, China<br><br>Chairperson: Wang, Guolin            |
| Chen, Ping                 | Kang, Naixin                             | 215517/082309  | The Second Xiangya Hospital,                                                                  | The Second Xiangya Hospital,                                                                                                 |
|                            | Liu, Caihong<br>Luo, Hong                |                | Central South University, No.139,<br>Renmin Road (M), Changsha,<br>Hunan, 410011, China       | Central South University, No.139,<br>Renmin Road (M), Changsha,<br>Hunan, 410011, China<br><br>Chairperson: Yang, Lianyue    |
| Chen, Ping                 | Ji, Binbin                               | 010641/082323  | General Hospital of Shenyang                                                                  | General Hospital of Shenyang                                                                                                 |
|                            | Wang, Yan<br>Zhao, Haitao                |                | Military Command, No 83 Wenhua<br>Road, Shenhe District, Shenyang,<br>Liaoning, 110015, China | Military Command, No 83 Wenhua<br>Road, Shenhe District, Shenyang,<br>Liaoning, 110015, China<br><br>Chairperson: Ni, Yanjun |

|                          |                                                                                         |               |                                                                                                                                 |                                                                                                                                                              |
|--------------------------|-----------------------------------------------------------------------------------------|---------------|---------------------------------------------------------------------------------------------------------------------------------|--------------------------------------------------------------------------------------------------------------------------------------------------------------|
| He, Bei                  | Mei, Jingjing<br>Wu, Rui<br>Yang, Wei                                                   | 209698/082616 | Peking University Third Hospital, No. 49, Garden North Road, Haidian District, Beijing, 100191, China                           | Peking University Third Hospital, No. 49, Garden North Road, Haidian District, Beijing, 100191, China<br>Chairperson: Fan, Dongsheng                         |
| Kang, Jian               | Hou, Gang<br>Wang, Qiuyue                                                               | 218708/083884 | The First Hospital of China Medical University, No.155 Nanjing North Street, Heping District, Shenyang, Liaoning, 110001, China | The First Hospital of China Medical University, No.155 Nanjing North Street, Heping District, Shenyang, Liaoning, 110001, China<br>Chairperson: Yu, Xiaosong |
| Lin, Yingxiang. MD       | Lin, Yingxiang MD<br>An, Li<br>Bu, Xiaoning<br>Liang, Lirong<br>Lu, Yong<br>Zhang, Hong | 243715/094465 | Beijing Chao-Yang Hospital, 8 Gongren Tiyuchang Nanlu, Chaoyang District, Beijing, 100020, China                                | Beijing Chao-Yang Hospital, 8 Gongren Tiyuchang Nanlu, Chaoyang District, Beijing, 100020, China<br>Chairperson: Shen, Yanying                               |
| Liu, Jinming. MB, MM, MD | Bai, Jiuwu<br>Cao, Weijun<br>Liang, Shuo<br>Xu, Liyun<br>Yang, Wenlan                   | 216127/082741 | Shanghai Pulmonary Hospital, No. 507 Zhengmin Road, Yangpu District, Shanghai, 200433, China                                    | Shanghai Pulmonary Hospital, No. 507 Zhengmin Road, Shanghai, 200433, China<br>Chairperson: Ding, Wei                                                        |
| Sun, Shenghua. MD        | Tang, Wenxiang<br>Xie, Lihua<br>Yang, Honghui<br>Zhan, Juan                             | 225652/086709 | The 3rd Xiangya Hospital, Central South University, Respiratory, No.138 Tongzipo Road, Changsha, 410013, China                  | The 3rd Xiangya Hospital, Central South University, No.138 Tongzipo Road, Changsha, 410013, China<br>Chairperson: Lu, Jiexiang                               |

|                                     |                                                               |               |                                                                                                                                   |                                                                                                                                                            |
|-------------------------------------|---------------------------------------------------------------|---------------|-----------------------------------------------------------------------------------------------------------------------------------|------------------------------------------------------------------------------------------------------------------------------------------------------------|
| Wan, Huanying. MD                   | Cheng, Qijian<br>Qian, Yanrong<br>Zhou, Jianping<br>Zhou, Min | 121287/084332 | Ruijin Hospital affiliated to Shanghai<br>Jiao Tong University, No 197 Rui Jin<br>Er Road, Shanghai, 200025, China                | Ruijin Hospital affiliated to<br>Shanghai Jiao Tong University, No<br>197 Rui Jin Er Road, Shanghai,<br>200025, China<br>Chairperson: Su, Yan              |
| Wang, Changzheng.<br>BS,<br>MD, PhD | Ma, Qianli<br>Zhang, Qiao                                     | 209692/082692 | Xinqiao Hospital, Third Military<br>Medical University, Xinqiao Street,<br>Sha Ping Ba District, Chongqing,<br>400037, China      | Xinqiao Hospital, Third Military<br>Medical University, Xinqiao Street,<br>Sha Ping Ba District, Chongqing,<br>400037, China<br>Chairperson: Xu, Jiancheng |
| Wang, Guangfa. MD,<br>PhD           | Chen, Jian<br>Zhang, Wei                                      | 215276/082285 | Peking University First Hospital,<br>Respiratory Department, No. 8<br>Xishiku Street, Xicheng District,<br>Beijing, 100034, China | Beijing University First Hospital,<br>No. 6 Da Hong Luo Chang Street,<br>Beijing, 100034, China<br>Chairperson: Guo, Xiaohui                               |
| Wen, Fuqiang. MD                    | Chen, Lei<br>Ou, Xuemei<br>Yang, Ting                         | 209697/087957 | West China Hospital, Sichuan<br>University, No. 37, Guoxue Alley,<br>Chengdu, 610041, China                                       | West China Hospital, Sichuan<br>University, No. 37, Guoxue Alley,<br>Chengdu, 610041, China<br>Chairperson: Zeng, Zhi                                      |
| Wen, Zhong-Guang.<br>MD             | Ma, Lingyun<br>Wang, Haiyan                                   | 009797/082259 | Beijing 304 Military Hospital, No. 51<br>Fucheng Road, Haidian District,<br>Beijing, 100048, China                                | Beijing 304 Military Hospital, No.<br>51 Fucheng Road, Haidian<br>District, Beijing, 100048, China<br>Chairperson: Lu, Jiaqi                               |
| Wu, Changgui. MD,<br>PhD            | Liu, Lingli<br>Ouyang, Haifeng                                | 049080/082262 | Xijing Hospital, No 15, Changle<br>Western Road, Xi'an, Shaanxi,<br>710032, China                                                 | Xijing Hospital, No 15, Changle<br>Western Road, Xi'an, Shaanxi,<br>710032, China<br>Chairperson: Li, Mingquan                                             |

|                          |                                                                          |               |                                                                                                                                              |                                                                                                                                                                      |
|--------------------------|--------------------------------------------------------------------------|---------------|----------------------------------------------------------------------------------------------------------------------------------------------|----------------------------------------------------------------------------------------------------------------------------------------------------------------------|
| Yang, Heping. MD,<br>PhD | Chen, Yongfeng<br>Dai, Xiaotian                                          | 216272/082730 | Southwest Hospital, Third Military<br>Medical University, NO. 30<br>Gaotanyanzheng Street, Sha Ping Ba<br>District, Chongqing, 400038, China | Southwest Hospital, Third Military<br>Medical University - Chongqing-<br>China, Gaotanyan Street 29,<br>Shapingba District, 400038, China<br>Chairperson: He, Fei    |
| Yang, Lan                | Chen, Tianjun<br>Li, Feiyan<br>Shi, Zhihong                              | 007227/082316 | First Affiliated Hospital, Xian Jiaotong<br>University, No. 277, Yanta West<br>Road, Xi'an, Shaanxi, 710061, China                           | First Affiliated Hospital, Xian<br>Jiaotong University,<br>Cardiovascular Medicine, No.<br>277, West Yanta Road, Xi'an,<br>710061, China<br>Chairperson: Wang, Yanni |
| Zheng, Jinping. MD       | Gao, Yi<br>Ma, Jinfang<br>Tang, Yan<br>Xie, Yanqing                      | 052101/082204 | First Affiliated Hospital of Guangzhou<br>Medical College, No 151 Yanjiang<br>Road, Guangzhou, Guangdong,<br>510120, China                   | First Affiliated Hospital of<br>Guangzhou Medical College, No.<br>151 Yanjiang Road, Guangzhou,<br>510120, China<br>Chairperson: Li, Fanjun                          |
| Zhong, Xiaoning          | Bai, Jing<br>He, Zhiyi<br>Liang, Yi<br>Tang, Haijuan<br>Yang, Meiling    | 243748/094464 | First Affiliated Hospital of Guangxi<br>Medical University, No. 6<br>Shuangyong Road, Nanning,<br>Guangxi, 530021, China                     | First Affiliated Hospital of Guangxi<br>Medical University, No. 6<br>Shuangyong Road, Nanning,<br>Guangxi, 530021, China<br>Chairperson: Ning, Xia                   |
| Zhou, Jianying           | Fang, Liangjie<br>Shen, Yihong<br>Xu, Panfeng<br>Xu, Xuanli<br>Zhou, Hua | 044960/086492 | First Affiliated Hospital of Zhejiang<br>University, No. 79, Qing Chun Road,<br>Hang Zhou, Zhejiang, 310003, China                           | The First Affiliated Hospital of<br>Medical School of Zhejiang<br>University, No. 79, Qing Chun<br>Road, Hang Zhou, Zhejiang,<br>310003, China                       |



|                                     |                                                                                           |               |                                                                                                                                     |                                                                                                                                                              |
|-------------------------------------|-------------------------------------------------------------------------------------------|---------------|-------------------------------------------------------------------------------------------------------------------------------------|--------------------------------------------------------------------------------------------------------------------------------------------------------------|
| Chairperson: Liu, Kezhou            |                                                                                           |               |                                                                                                                                     |                                                                                                                                                              |
| Zhou, Xin                           | Bao, Wuping<br>Chen, Qin                                                                  | 219092/083911 | Shanghai First People's Hospital,<br>Respiratory Department, No 100 Hai<br>Ning Road, Hong Kou District,<br>Shanghai, 200080, China | Shanghai First People's Hospital,<br>No 85 Wujin Road, Shanghai,<br>China<br>Chairperson: Liu, Guohua                                                        |
| Korea                               |                                                                                           |               |                                                                                                                                     |                                                                                                                                                              |
| Chang, Jung Hyun.<br>MS,<br>MD, PhD | Kim, Seo-Woo<br>Lee, Jin Hwa<br>Ryu, Yon Ju                                               | 214747/081877 | Ewha Womans University, Mokdong<br>Hospital, 911-1, Mokdong,<br>Yangcheongu, Seoul, 158-710, Korea                                  | Ewha Womans University,<br>Mokdong Hospital, 911-1,<br>Mokdong, Yangcheongu, Seoul,<br>158-710, Korea<br>Chairperson: Lim, Key Hwan                          |
| Kim, Chi-Hong. BS,<br>MD,<br>PhD    | Kim, Sung Kyoung                                                                          | 216541/082778 | The Catholic University of Korea, St.<br>Vincent's Hospital, 93-6, Ji-dong<br>Paldal-gu, Suwon, Gyeonggi-do, 442-<br>723, Korea     | The Catholic University of Korea,<br>St. Vincent's Hospital, 93-6 Jidong,<br>Paldal-gu, Suwon City,<br>Gyeonggi-do, 442-723, Korea<br>Chairperson: Park, Y H |
| Lee, Yong Chul                      | Choi, Kyoung Hwa<br>Chung, Chi Ryang<br>Kim, So Ri<br>Park, Seoung Ju<br>Park, Seung Yong | 214922/081878 | Chonbuk National University<br>Hospital, 42 Wonjam-5gil, Deokjin-gu,<br>Jeonju-si, Jeollabuk-Do, 561-712,<br>Korea                  | Chonbuk National University<br>Hospital, 42 Wonjam-5gil, Deokjingu,<br>Jeonju-si, Jeollabuk-Do, 561-<br>712, Korea<br>Chairperson: Park, Sung Kwang          |
| Philippines                         |                                                                                           |               |                                                                                                                                     |                                                                                                                                                              |
| de Guia, Teresita S.<br>MD          | Jusi, Rhea Louela G.<br>MD                                                                | 029968/081100 | Philippine Heart Center, Division of<br>Pulmonary and Critical Care, East                                                           | Philippine Heart Center,<br>Institutional Review Board, East                                                                                                 |

|                            |                                                                                                                  |               |                                                                                                         |                                                                                                                                                  |
|----------------------------|------------------------------------------------------------------------------------------------------------------|---------------|---------------------------------------------------------------------------------------------------------|--------------------------------------------------------------------------------------------------------------------------------------------------|
|                            |                                                                                                                  |               | Avenue, Quezon City, 1100,<br>Philippines                                                               | Avenue, Quezon City, 1100,<br>Philippines<br>Chairperson: Durante, Marcelito                                                                     |
| Santiago, Joel M.<br>MD    | Patanao Jr, Arturo C.<br>MD<br>Tan, Rachelle T. MD                                                               | 044130/080700 | Quirino Memorial Medical Center,<br>Katipunan Road, Project 4, Quezon<br>City, 1109, Philippines        | Hospital Ethics Committee,<br>Quirino Memorial Medical Center,<br>Project 4, Quezon City, Philippines<br>Chairperson: Reside, Evelyn<br>Victoria |
| Taiwan                     |                                                                                                                  |               |                                                                                                         |                                                                                                                                                  |
| Feng, Jia-Yih              | Huang, Chu-Yun<br>Perng, Diahn-Warng<br>Shih, Jen-Fu<br>Su, Wei-Juin<br>Yang, Kuang-Yao                          | 219863/084030 | Taipei Veterans General Hospital,<br>No. 201, Sec 2, Shih-Pai Road,<br>Taipei, 11217, Taiwan            | Taipei Veterans General Hospital,<br>No. 201, Shih-Pai Road, Sec 2,<br>Taipei, 11217, Taiwan                                                     |
| Hang, Liang-Wen.<br>MD     | Chen, Chia-Hung<br>Liang, Shinn-Jye<br>Lin, Yu-Chao<br>Tu, Chih-Yen<br>Yen, Chih-Ching                           | 006379/081591 | China Medical College Hospital,<br>Internal Medicine, No. 2, Yuh-Der<br>Road, Taichung, 404, Taiwan     | China Medical College Hospital,<br>9F, First Medical Building, 2, Yuh-<br>Der Road, Taichung, 404, Taiwan<br>Chairperson: Fuh, Martin            |
| Hsu, Jeng-Yuan. MD,<br>PhD | Chan, Ming-Cheng<br>Chen, Kun-Chieh<br>Chin, Chun-Shih<br>Huang, Wei- Chang<br>Shen, Gwan-Han<br>Wu, Chieh-Liang | 016329/081592 | Taichung Veterans General Hospital,<br>No. 160, Chung-Kuang Road,<br>Section 3, Taichung, 40705, Taiwan | Taichung Veterans General<br>Hospital, No. 160, Chung-Kuang<br>Road, Section 3, Taichung, 40705,<br>Taiwan<br>Chairperson: Ou, Yen-Chuan         |

Yang, Tsung-Ying

|                                                          |                                                                                                                                                                                     |               |                                                                                                                                                                               |                                                                                                                                                          |
|----------------------------------------------------------|-------------------------------------------------------------------------------------------------------------------------------------------------------------------------------------|---------------|-------------------------------------------------------------------------------------------------------------------------------------------------------------------------------|----------------------------------------------------------------------------------------------------------------------------------------------------------|
| Kuo, Han-Pin. MBBS,<br>PhD                               | Lee, Kang-Yun<br>Lin, Horng-Chyuan<br>Lin, Shu-Min<br>Lo, Yu-Lun<br>Wang, Chun-Hua                                                                                                  | 006334/081589 | Chang Gung Memorial Hospital-<br>Linkou, No. 5, Fu-Shing Street, Guei-<br>Shan Shiang, Tau-Yuan County, 333,<br>Taiwan                                                        | Chang Gung Medical Foundation,<br>199 Tung Hwa North Road, Taipei,<br>10507, Taiwan<br>Chairperson: Hsieh, Tsang-Tang                                    |
| Lin, Ching-Hsiung.<br>MD,<br>PhD<br>Hsu, Jeng-Yuan (FPI) | Chai, Woei-Horng<br>Chen, Cheng-Hsiung<br>Ji, Bin-Chuan<br>Yeh, Chin-Shui                                                                                                           | 214385/081700 | Changhua Christian Hospital, 135<br>Nan-Hsiao Street, Changhua, 500,<br>Taiwan                                                                                                | Changhua Christian Hospital,<br>Department of Internal Medicine,<br>135 Nan-Shiao Street, Changhua,<br>500, Taiwan<br>Chairperson: Soon, Maw-Soan.<br>MD |
| Tsao, Shih-Ming. MD,<br>MB                               | Wu, Tzu-Chin                                                                                                                                                                        | 240426/096432 | Chung Shan Medical University<br>Hospital, No. 110, Sec. 1, Jianguo<br>North Road, Taichung, 40201,<br>Taiwan                                                                 | Chung Shan Medical University<br>Hospital, No. 110, Sec. 1, Jianguo<br>North Road, Taichung, Taiwan<br>Chairperson: Han, Chih-Ping                       |
| Wang, Chin-Chou.<br>MD,<br>MPH                           | Chao, Tung-Ying<br>Chen, Yung-Che<br>Chin, Chien-Hung<br>Fang, Wen-Feng<br>Leung, Sum-Yee<br>Liu, Shih-Feng<br>Su, Mao-Chang<br>Tseng, Chia-Cheng<br>Wang, Yi-Hsi<br>Wu, Chao-Chien | 214397/081703 | Chang Gung Memorial Hospital-<br>Kaohsiung Medical Center, Division<br>of Pulmonary & Critical Care<br>Medicine, 123 Dapi Road, Niasong<br>District, Kaohsiung, 83301, Taiwan | Chang Gung Medical Foundation,<br>199 Tung Hwa North Road, Taipei,<br>10507, Taiwan<br>Chairperson: Hsieh, Tsang-Tang                                    |

|                               |                                                 |               |                                                                                                                                 |                                                                                                                                                                |
|-------------------------------|-------------------------------------------------|---------------|---------------------------------------------------------------------------------------------------------------------------------|----------------------------------------------------------------------------------------------------------------------------------------------------------------|
| Wang, Hao-Chien.<br>MBBS, PhD | Ho, Chao-Chi<br>Hsu, Chia-Lin<br>Kuo, Ping-Hung | 016238/081590 | National Taiwan University Hospital,<br>Department of Internal Medicine, No.<br>7 Chung-Shan South Road, Taipei,<br>100, Taiwan | National Taiwan University<br>Hospital, Department of Internal<br>Medicine, No. 7, Jung-Shan South<br>Road, Taipei, 100, Taiwan<br>Chairperson: Ho, Hong-Nerng |
|-------------------------------|-------------------------------------------------|---------------|---------------------------------------------------------------------------------------------------------------------------------|----------------------------------------------------------------------------------------------------------------------------------------------------------------|

---

All centres participated in the study under the US IND. <sup>a</sup>No patients randomised.

#### **Supplementary Appendix 4** Statistical analysis used for 'other' efficacy endpoints and safety analyses

COPD symptoms were scored as follows: breathlessness on a scale of 0 (not breathless at rest or exertion) to 4 (breathless), cough scale 0 (none) to 3 (severe), and sputum production scale 0 (none) to 3 (severe). Total symptom-free 24 hour periods were defined as days on which cough, sputum and breathlessness were all scored as zero. The percentage of symptom-free 24 hour periods (cough, sputum, breathlessness, and combined total) during each month of treatment, over the 24-week treatment period and as change from baseline (percentage of symptom-free 24 hour periods during the run-in) were summarised. Mean symptom scores were summarised in the same way, and the percentage of night-time awakenings (requiring rescue use) free days were summarised. The mean symptom score averaged over the entire 24-week treatment period was analysed for cough, sputum and breathlessness separately, mean night-time awakenings requiring rescue use, percentage of rescue-free 24 hour periods, and mean rescue use were summarised and analysed using an analysis of covariance (ANCOVA) model with covariates of baseline symptom score, smoking status at screening and treatment. In addition, a sensitivity analysis was performed for those patients who had at least one night-time awakening during baseline.

The incidence of AEs, COPD exacerbations and pneumonia, vital signs and ECG parameters, oropharyngeal examination data, urine cortisol and data for clinical laboratory parameters were summarised. All actual and change from baseline values for pulse rate, systolic and diastolic blood pressure were summarised by treatment using summary statistics together with maximum (pulse rate and systolic blood pressure) or minimum (diastolic blood pressure) post baseline values, including any recorded at scheduled, unscheduled and early withdrawal visits. From treatment day 2, pre-dose pulse rate, systolic and diastolic blood pressure were analysed using a repeated measures model, with a repeated effect of day within each patient and an associated unstructured covariance structure. For each endpoint, the model was fitted with a response variable of change from baseline value. The explanatory variables were treatment group, smoking status at screening, baseline (pulse rate, systolic or diastolic blood pressure) and day (as a categorical variable), in addition to day by baseline and day by treatment interaction terms. In addition, the 10 min post-dose assessment made on Day 1 was analysed using an ANCOVA model with treatment group, smoking status and baseline pulse rate, systolic blood pressure or diastolic blood pressure as the explanatory variables. Actual and change from baseline values for QTc(F), QTc(B) and heart rate were summarised by treatment using summary statistics together with maximum post baseline values, including any recorded at scheduled, unscheduled and early withdrawal visits.

Pre-dose QTc(F) and heart rate were analysed using a repeated measures model as described for the primary endpoint. In addition, the 10 minute post-dose assessment made on Day 1 was analysed using an ANCOVA, using the same model as described for vital signs. 24 hour UC excretion was log transformed, summarised and analysed for the UC population. Data were analysed using an ANCOVA model with covariates of log baseline, smoking status and treatment.

Total CAT scores and total CAT score change from baseline values at Weeks 12 and 24 were summarised.

**Supplementary Table 1** Change from baseline and responder analysis for CRQ-SAS dyspnoea domain at Week 24 (Day 168) (ITT population).

|                                            | Placebo<br>(N = 162) | FF/VI 50/25<br>(N = 160) | FF/VI 100/25<br>(N = 161) | FF/VI 200/25<br>(N = 160) |
|--------------------------------------------|----------------------|--------------------------|---------------------------|---------------------------|
| Mean CRQ-SAS Dyspnea score                 |                      |                          |                           |                           |
| <i>n</i> <sup>a</sup>                      | 151                  | 144                      | 154                       | 151                       |
| <i>b</i> <sup>b</sup>                      | 128                  | 134                      | 136                       | 132                       |
| LS mean (SE)                               | 5.55 (0.081)         | 5.77 (0.080)             | 5.89 (0.079)              | 5.83 (0.080)              |
| LS mean change (SE)                        | 0.09 (0.081)         | 0.30 (0.080)             | 0.43 (0.079)              | 0.37 (0.080)              |
| Difference vs placebo<br>(95% CI)          |                      | 0.21 (−0.01, 0.43)       | 0.34 (0.12, 0.56)         | 0.27 (0.05, 0.50)         |
| <i>p value</i>                             |                      | 0.064                    | 0.003                     | 0.016                     |
| Responder analysis                         |                      |                          |                           |                           |
| <i>n</i>                                   | 162                  | 157                      | 160                       | 159                       |
| Responder <sup>c</sup> , <i>n</i> (%)      | 56 (35)              | 61 (39)                  | 60 (38) <sup>d</sup>      | 64 (40)                   |
| Non-responder <sup>c</sup> , <i>n</i> (%)  | 106 (65)             | 96 (61)                  | 100 (63) <sup>d</sup>     | 95 (60)                   |
| Treatment vs placebo<br>odds ratio, 95% CI |                      | 1.22 (0.73, 2.04)        | 1.43 (0.86, 2.39)         | 1.52 (0.91, 2.52)         |
| <i>p value</i>                             |                      | 0.438                    | 0.166                     | 0.108                     |

CI = confidence interval; CRQ-SAS = Chronic Respiratory Questionnaire - Self-Administered Standardized; FF = fluticasone furoate; ITT = intent-to-treat; LS = least squares; SE = standard error; VI = vilanterol.

<sup>a</sup>Number of patients with analysable data for one or more time points; <sup>b</sup>Number of patients with analysable data at the given time points; <sup>c</sup>Patients were classified as a responder if they had a change from baseline in CRQ-SAS Dyspnea domain  $\geq 0.5$ ; <sup>d</sup>Data does not add up to 100% due to rounding.

**Supplementary Table 2** Mean change from baseline in CRQ-SAS other domains and total score at Week 24 (Day 168) (ITT population).

|                                  | Placebo<br>(N = 162) | FF/VI 50/25<br>(N = 160) | FF/VI 100/25<br>(N = 161) | FF/VI 200/25<br>(N = 160) |
|----------------------------------|----------------------|--------------------------|---------------------------|---------------------------|
| <b>Fatigue domain</b>            |                      |                          |                           |                           |
| <i>n</i> <sup>a</sup>            | 151                  | 147                      | 155                       | 151                       |
| <i>n</i> <sup>b</sup>            | 128                  | 137                      | 138                       | 133                       |
| LS mean (SE)                     | 4.69 (0.071)         | 4.88 (0.069)             | 5.06 (0.068)              | 5.02 (0.069)              |
| LS mean change (SE)              | −0.01 (0.071)        | 0.17 (0.069)             | 0.36 (0.068)              | 0.31 (0.069)              |
| Difference vs placebo (95% CI)   |                      | 0.18 (−0.01, 0.38)       | 0.37 (0.18, 0.56)         | 0.32 (0.13, 0.52)         |
| <i>p</i> value                   |                      | 0.062                    | <0.001                    | 0.001                     |
| <b>Emotional function domain</b> |                      |                          |                           |                           |
| <i>n</i> <sup>a</sup>            | 151                  | 147                      | 155                       | 151                       |
| <i>n</i> <sup>b</sup>            | 128                  | 137                      | 138                       | 133                       |
| LS mean (SE)                     | 5.01 (0.076)         | 5.34 (0.074)             | 5.47 (0.073)              | 5.39 (0.074)              |
| LS mean change (SE)              | −0.14 (0.076)        | 0.19 (0.074)             | 0.32 (0.073)              | 0.24 (0.074)              |
| Difference vs placebo (95% CI)   |                      | 0.33 (0.12, 0.54)        | 0.45 (0.25, 0.66)         | 0.37 (0.17, 0.58)         |
| <i>p</i> value                   |                      | 0.002                    | <0.001                    | <0.001                    |
| <b>Mastery domain</b>            |                      |                          |                           |                           |
| <i>n</i> <sup>a</sup>            | 151                  | 147                      | 155                       | 151                       |
| <i>n</i> <sup>b</sup>            | 128                  | 137                      | 138                       | 133                       |
| LS mean (SE)                     | 5.04 (0.080)         | 5.27 (0.078)             | 5.36 (0.078)              | 5.33 (0.079)              |
| LS mean change (SE)              | 0.03 (0.080)         | 0.26 (0.078)             | 0.35 (0.078)              | 0.32 (0.079)              |
| Difference vs placebo (95% CI)   |                      | 0.23 (0.01, 0.45)        | 0.32 (0.10, 0.54)         | 0.29 (0.07, 0.51)         |
| <i>p</i> value                   |                      | 0.038                    | 0.004                     | 0.010                     |



|                                |               |                   |                   |                   |
|--------------------------------|---------------|-------------------|-------------------|-------------------|
| Total score                    |               |                   |                   |                   |
| $n^a$                          | 151           | 147               | 155               | 151               |
| $n^b$                          | 128           | 137               | 138               | 133               |
| LS mean (SE)                   | 5.08 (0.064)  | 5.34 (0.062)      | 5.46 (0.062)      | 5.40 (0.063)      |
| LS mean change (SE)            | -0.02 (0.064) | 0.24 (0.062)      | 0.35 (0.062)      | 0.30 (0.063)      |
| Difference vs placebo (95% CI) |               | 0.26 (0.08, 0.43) | 0.37 (0.20, 0.55) | 0.32 (0.14, 0.49) |
| $p$ value                      |               | 0.004             | <0.001            | <0.001            |

CI = confidence interval; CRQ-SAS = Chronic Respiratory Questionnaire - Self-Administered Standardized; FF = fluticasone furoate; LS = least squares; ITT = intent-to-treat; SE = standard error; VI = vilanterol.

<sup>a</sup>Number of patients with analysable data for one or more time points; <sup>b</sup>Number of patients with analysable data at the given time points.

**Supplementary Table 3** Summary of on-treatment adverse events leading to permanent discontinuation of study drug or withdrawal from the study (ITT population).

| System Organ Class<br>preferred term                                           | Placebo<br>(N = 162) | FF/VI 50/25<br>(N = 160) | FF/VI 100/25<br>(N = 161) | FF/VI 200/25<br>(N = 160) |
|--------------------------------------------------------------------------------|----------------------|--------------------------|---------------------------|---------------------------|
| Any event                                                                      | 15 (9)               | 6 (4)                    | 8 (5)                     | 18 (11)                   |
| Respiratory, thoracic and<br>mediastinal disorders                             | 9 (6)                | 2 (1)                    | 3 (2)                     | 9 (6)                     |
| Infections and infestations                                                    | 4 (2)                | 2 (1)                    | 2 (1)                     | 5 (3)                     |
| Cardiac disorders                                                              | 2 (1)                | 1 (<1)                   | 0                         | 2 (1)                     |
| Injury, poisoning and procedural<br>complications                              | 1 (<1)               | 0                        | 1 (<1)                    | 1 (<1)                    |
| Nervous system disorders                                                       | 1 (<1)               | 0                        | 0                         | 2 (1)                     |
| Gastrointestinal disorders                                                     | 2 (1)                | 0                        | 0                         | 0                         |
| General disorders and<br>administration site conditions                        | 2 (1)                | 0                        | 0                         | 0                         |
| Metabolism and nutrition disorders                                             | 1 (<1)               | 0                        | 0                         | 1 (<1)                    |
| Neoplasms benign, malignant and<br>unspecified (including cysts and<br>polyps) | 0                    | 0                        | 1 (<1)                    | 1 (<1)                    |
| Skin and subcutaneous tissue<br>disorders                                      | 1 (<1)               | 1 (<1)                   | 0                         | 0                         |
| Blood and lymphatic system<br>disorders                                        | 0                    | 0                        | 0                         | 1 (<1)                    |
| Renal and urinary disorders                                                    | 0                    | 0                        | 1 (<1)                    | 0                         |
| Reproductive system and breast<br>disorders                                    | 0                    | 0                        | 1 (<1)                    | 0                         |
| Vascular disorders                                                             | 0                    | 0                        | 0                         | 1 (<1)                    |

Data are presented as n (%).

FF = fluticasone furoate; ITT = intent-to-treat; VI = vilanterol.

**Supplementary Table 4** Summary of on-treatment exacerbations and pneumonia (ITT population)

|                                                      | Placebo<br>(N = 162) | FF/VI 50/25<br>(N = 160) | FF/VI 100/25<br>(N = 161) | FF/VI 200/25<br>(N = 160) |
|------------------------------------------------------|----------------------|--------------------------|---------------------------|---------------------------|
| On-treatment exacerbations                           |                      |                          |                           |                           |
| Patients with one or more exacerbation, <i>n</i> (%) | 22 (14)              | 20 (13)                  | 19 (12)                   | 18 (11)                   |
| Severity of exacerbation, <i>n</i> (%)               |                      |                          |                           |                           |
| Moderate                                             | 12 (43)              | 10 (42)                  | 12 (52)                   | 8 (42)                    |
| Severe                                               | 7 (25)               | 2 (8)                    | 3 (13)                    | 8 (42)                    |
| Outcome                                              |                      |                          |                           |                           |
| Resolved <sup>a</sup>                                | 26 (93)              | 24 (100)                 | 21 (91)                   | 18 (95)                   |
| Fatal                                                | 0                    | 0                        | 0                         | 0                         |
| Not resolved                                         | 2 (7)                | 0                        | 2 (9)                     | 1 (5) <sup>b</sup>        |
| On-treatment pneumonia                               |                      |                          |                           |                           |
| Patients who had at least one:                       |                      |                          |                           |                           |
| Pneumonia, <i>n</i> (%)                              | 4 (2)                | 2 (1)                    | 1 (<1)                    | 5 (3)                     |
| Pneumonia recorded as SAE, <i>n</i> (%)              | 3 (75)               | 2 (100)                  | 0                         | 2 (40)                    |
| Fatal pneumonia, <i>n</i> (%)                        | 1 (25)               | 0                        | 0                         | 1 (20)                    |

FF = fluticasone furoate; ITT = intent-to-treat; SAE = serious adverse event; VI = vilanterol.

<sup>a</sup>All exacerbations that were recorded as SAEs had an outcome of 'resolved' at the end of the study except for one in the FF/VI 200/25 mcg treatment group (see footnote b). <sup>b</sup>The patient had an exacerbation recorded as a SAE with an outcome recorded as 'recovering/resolving' at the end of the study, which has been summarised as 'not resolved'.

**Supplementary Table 5** Pre-dose vital signs assessments and ECG heart rate at Week 24 (Day 168) (ITT population).

|                                                                  | Placebo<br>(N = 162) | FF/VI 50/25<br>(N = 160) | FF/VI 100/25<br>(N = 161) | FF/VI 200/25<br>(N = 160) |
|------------------------------------------------------------------|----------------------|--------------------------|---------------------------|---------------------------|
| Statistical analysis of pre-dose pulse rate (bpm)                |                      |                          |                           |                           |
| <i>n</i> <sup>a</sup>                                            | 162                  | 158                      | 160                       | 159                       |
| <i>n</i> <sup>b</sup>                                            | 130                  | 137                      | 138                       | 134                       |
| LS mean (SE)                                                     | 76.2 (0.82)          | 76.2 (0.80)              | 76.3 (0.80)               | 76.6 (0.81)               |
| LS mean change (SE)                                              | −0.4 (0.82)          | −0.4 (0.80)              | −0.3 (0.80)               | 0.0 (0.81)                |
| Difference vs placebo                                            | —                    | 0.1                      | 0.2                       | 0.4                       |
| 95% CI                                                           | —                    | (−2.2, 2.3)              | (−2.1, 2.4)               | (−1.9, 2.7)               |
| <i>p</i> value                                                   | —                    | 0.962                    | 0.895                     | 0.719                     |
| Statistical analysis of pre-dose systolic blood pressure (mmHg)  |                      |                          |                           |                           |
| <i>n</i> <sup>a</sup>                                            | 162                  | 158                      | 160                       | 159                       |
| <i>n</i> <sup>b</sup>                                            | 130                  | 137                      | 138                       | 134                       |
| LS mean (SE)                                                     | 128.5 (0.95)         | 128.1 (0.93)             | 128.3 (0.92)              | 128.9 (0.94)              |
| LS mean change (SE)                                              | −0.6 (0.95)          | −0.9 (0.93)              | −0.8 (0.92)               | −0.1 (0.94)               |
| Difference vs placebo                                            | —                    | −0.4                     | −0.2                      | 0.4                       |
| 95% CI                                                           | —                    | (−3.0, 2.2)              | (−2.8, 2.4)               | (−2.2, 3.1)               |
| <i>p</i> value                                                   | —                    | 0.771                    | 0.877                     | 0.739                     |
| Statistical analysis of pre-dose diastolic blood pressure (mmHg) |                      |                          |                           |                           |
| <i>n</i> <sup>a</sup>                                            | 162                  | 158                      | 160                       | 159                       |
| <i>n</i> <sup>b</sup>                                            | 130                  | 137                      | 138                       | 134                       |
| LS mean (SE)                                                     | 76.8 (0.65)          | 76.6 (0.63)              | 76.2 (0.63)               | 77.1 (0.64)               |
| LS mean change (SE)                                              | −1.1 (0.65)          | −1.3 (0.63)              | −1.7 (0.63)               | −0.8 (0.64)               |
| Difference vs placebo                                            | —                    | −0.2                     | −0.6                      | 0.3                       |
| 95% CI                                                           | —                    | (−2.0, 1.6)              | (−2.4, 1.2)               | (−1.5, 2.1)               |
| <i>p</i> value                                                   | —                    | 0.832                    | 0.492                     | 0.716                     |

| Statistical analysis of pre-dose QTc(F) (msec)        |              |              |              |              |
|-------------------------------------------------------|--------------|--------------|--------------|--------------|
| $n^a$                                                 | 138          | 142          | 146          | 147          |
| $n^b$                                                 | 130          | 137          | 138          | 134          |
| LS mean (SE)                                          | 409.0 (1.45) | 410.5 (1.41) | 409.7 (1.41) | 408.8 (1.43) |
| LS mean change (SE)                                   | 0.4 (1.45)   | 1.9 (1.41)   | 1.1 (1.41)   | 0.3 (1.43)   |
| Difference vs placebo                                 | –            | 1.5          | 0.7          | –0.2         |
| 95% CI                                                | –            | (–2.5, 5.4)  | (–3.3, 4.7)  | (–4.2, 3.8)  |
| $p$ value                                             | –            | 0.475        | 0.725        | 0.933        |
| Statistical analysis of pre-dose ECG heart rate (bpm) |              |              |              |              |
| $n^a$                                                 | 138          | 142          | 146          | 147          |
| $n^b$                                                 | 130          | 137          | 138          | 134          |
| LS mean (SE)                                          | 72.5 (0.87)  | 72.5 (0.85)  | 73.4 (0.84)  | 72.4 (0.85)  |
| LS mean change (SE)                                   | –1.5 (0.87)  | –1.5 (0.85)  | –0.6 (0.84)  | –1.6 (0.85)  |
| Difference vs placebo                                 | –            | 0.0          | 0.9          | –0.1         |
| 95% CI                                                | –            | (–2.4, 2.3)  | (–1.5, 3.2)  | (–2.5, 2.2)  |
| $p$ value                                             | –            | 0.969        | 0.482        | 0.906        |

CI = confidence interval; ECG = electrocardiogram; bpm = beats per minute; FF = fluticasone furoate;

ITT = intent-to-treat; LS = least-squares; QTc(F) = QT corrected using Fridericia's formula;

SE = standard error; VI = vilanterol.

<sup>a</sup>Number of subjects with analysable data for one or more time points; <sup>b</sup>Number of subjects with analysable data at the given time points.
